# Supplementary material
Source: publisher figshare collection journal article supplement (https://tandf.figshare.com/articles/dataset/_/7477574)
Supplement: Supplementary file 1 [file 2]

# Supplementary material to “Investigation of age-treatment interaction in the SPACE trial using different statistical approaches”

B. Haller, H.-H. Eckstein, P. A. Ringleb and K. Ulm

## STEPP

Test statistic for the test of the null hypothesis of no covariate-treatment interaction for the STEPP approach:

$$T_{STEPP} = \max_{j=1,\dots,K} \left( \frac{|\hat{\theta}_j - \hat{\theta}_{ALL}|}{\hat{\sigma}_j} \right), \quad (S1)$$

where  $\hat{\theta}_j$  is the estimated treatment effect (as the hazard ratio or the difference in Kaplan-Meier estimates at a given time point between the study groups) in the  $j^{th}$  of  $K$  subpopulations,  $\hat{\theta}_{ALL}$  the according estimate for the whole study population, and  $\hat{\sigma}_j$  an estimate for the standard error of the difference between  $\hat{\theta}_j$  and  $\hat{\theta}_{ALL}$ .

## Multivariable fractional polynomial interaction

Algorithm for the *FP2-flex1* approach:

1. Select best powers  $(p_1, p_2)$  for  $Z$  in a model as described in Equation 2 of the manuscript including  $T$  as additional covariate by finding the model (out of 36 candidates) with the highest(log-)likelihood.
2. Define the new predictors
  - $Z_{01} = Z^{p_1}$  if  $T = 0$       and       $Z_{01} = 0$       if  $T = 1$
  - $Z_{02} = Z^{p_2}$  if  $T = 0$       and       $Z_{02} = 0$       if  $T = 1$
  - $Z_{11} = 0$       if  $T = 0$       and       $Z_{11} = Z^{p_1}$       if  $T = 1$
  - $Z_{12} = 0$       if  $T = 0$       and       $Z_{12} = Z^{p_2}$       if  $T = 1$
3. Fit the two nested models  $M_1$  with covariates  $T, Z_{01}, Z_{02}, Z_{11}, Z_{12}$  and  $M_2$  with covariates  $T, Z^{p_1}, Z^{p_2}$  and compare the difference of model deviances with a  $\chi^2$  distribution with two degrees of freedom.

Algorithm for the *FP1-flex3* approach:

1. Select the best power transformation ( $p_1$ ) by finding the model with covariate-treatment interaction (out of 8 candidates) with the highest (log-)likelihood considering the transformed covariates
  - $Z_{01} = Z^{p_1}$  if  $T = 0$  and  $Z_{01} = 0$  if  $T = 1$
  - $Z_{11} = 0$  if  $T = 0$  and  $Z_{11} = Z^{p_1}$  if  $T = 1$
 and treatment group.
2. Find the best power transformation in an according model without a covariate-treatment interaction including the covariates  $T$  and  $Z^{p_1}$  (the selected transformation can be different to that determined for the model with interaction).
3. Compare the differences of model deviances with a  $\chi^2$  distribution with one degree of freedom. As the models might not be nested use of a  $\chi^2$  distribution is not well justified from a theoretical point of view and consequently the result should be interpreted as “indicative” rather than as “definitive”.

## Local partial-likelihood approach

Taylor expansions for  $\beta(Z)$  and  $f(Z)$  around a marker value of interest  $z_0$ :

$$\beta(z) \approx \beta(z_0) + \beta'(z_0)(z - z_0) = \zeta + \eta(z - z_0) \quad (\text{S2})$$

$$f(z) \approx f(z_0) + f'(z_0)(z - z_0) = \alpha + \gamma(z - z_0) \quad (\text{S3})$$

Local partial-likelihood within the neighbourhood of  $z_0$ :

$$l_{z_0}(\zeta, \eta, \gamma) = \frac{1}{n} \sum_{i=1}^n K_h(Z_i - z_0) \delta_i \left\{ \zeta T_i + \eta T_i(Z_i - z_0) + \gamma(Z_i - z_0) - \log \left( \sum_{j=1}^n Y_j(X_i) K_h(Z_j - z_0) \exp(\zeta T_j + \eta T_j(Z_j - z_0) + \gamma(Z_j - z_0)) \right) \right\}, \quad (\text{S4})$$

where  $\zeta$ ,  $\eta$ , and  $\gamma$  are as defined in Equations S2 and S3,  $K_h(\cdot)$  is a kernel weight with a given bandwidth of  $h$ ,  $\delta$  is the binary status variable, and  $Y_j(X_i)$  indicates, whether the observed time of individual  $j$  is larger than the observed time of individual  $i$ .

Test statistic for the test of the null hypothesis of no covariate-treatment interaction for the local partial likelihood approach:

$$Q_{LPLE} = \max_{1 \leq k \leq m} \left( \frac{\{\hat{\beta}(z_k) - \hat{\beta}\}^2}{\widehat{Var}\{\hat{\beta}(z_k) - \hat{\beta}\}} \right), \quad (\text{S5})$$

where  $\hat{\beta}$  is the estimated regression coefficient for a model assuming a constant treatment effect over the range of the covariate  $z$ ,  $m$  is the number of covariate values of interest,  $k$  indicates the according covariate value and  $\hat{\beta}(z_k)$  is the local estimate of the regression coefficient at the covariate value  $z_k$ .

## Modified covariate approach

The difference between the treatment groups can then be expressed as a hazard ratio and estimated for a given covariate value  $z$  as

$$\Delta(z) = \exp\{-\gamma'_0 W(z)\}. \quad (\text{S6})$$

To test for a covariate-treatment interaction, the model presented in Equation (4) of the manuscript can be compared with a model including only the transformed treatment variable, but not the covariate of interest, in the matrix  $W^*$  using a  $\chi^2$  test with an appropriate number of degrees of freedom. The degrees of freedom depend on the transformations used for the covariate of interest in  $W$  and consequently in  $W^*$  (e.g. spline function, penalized splines, ...).

## Point estimates and CIs for given age values

| Age |            | STEPP | Cox  | MFPI<br>FP2-flex1 | MFPI<br>FP1-flex3 | LPLE | Modif.<br>covar. |
|-----|------------|-------|------|-------------------|-------------------|------|------------------|
| 60  | Point est. | 0.57  | 0.68 | 0.70              | 0.71              | 0.53 | 0.70             |
|     | CI (low.)  | 0.28  | 0.39 | 0.40              | 0.41              | 0.26 | 0.42             |
|     | CI (upp.)  | 1.20  | 1.18 | 1.23              | 1.21              | 1.07 | 1.16             |
| 65  | Point est. | 0.88  | 0.87 | 0.99              | 0.87              | 0.95 | 0.94             |
|     | CI (low.)  | 0.42  | 0.58 | 0.61              | 0.58              | 0.49 | 0.62             |
|     | CI (upp.)  | 1.86  | 1.30 | 1.60              | 1.31              | 1.84 | 1.43             |
| 70  | Point est. | 1.20  | 1.10 | 1.26              | 1.09              | 1.39 | 1.31             |
|     | CI (low.)  | 0.63  | 0.79 | 0.82              | 0.78              | 0.77 | 0.87             |
|     | CI (upp.)  | 2.32  | 1.54 | 1.93              | 1.51              | 2.53 | 1.98             |
| 75  | Point est. | 1.45  | 1.41 | 1.48              | 1.38              | 1.76 | 1.61             |
|     | CI (low.)  | 0.82  | 0.97 | 1.01              | 0.96              | 1.03 | 1.02             |
|     | CI (upp.)  | 2.57  | 2.04 | 2.16              | 1.98              | 2.99 | 2.56             |
| 80  | Point est. | 1.36  | 1.80 | 1.64              | 1.78              | 1.42 | 1.83             |
|     | CI (low.)  | 0.68  | 1.09 | 0.98              | 1.08              | 0.77 | 0.97             |
|     | CI (upp.)  | 2.73  | 2.95 | 2.74              | 2.93              | 2.60 | 3.44             |

Table S1: Point estimates for the hazard ratio with according values of the pointwise 95% confidence interval for given age values of 60, 65, 70, 75 and 80 years obtained by the different methods. For STEPP and LPLE a linear interpolation between the two closest estimates was performed to obtain results for the given age values.

STEPP: Subpopulation treatment effects pattern plot  
Cox: Cox regression with linear age-treatment interaction  
MFPI: Multivariable fractional polynomial for interaction  
LPLE: Local partial likelihood estimation  
Modif. covar.: Modified covariate approach
